# Supplementary material for: Cadmium metal–organic frameworks: Ln3+ ion functionalized assembly, fluorescence tuning and polymer film preparation
Source: Royal Society of Chemistry journal article supplement (doi:10.1039/c5nj02999f), 2016-01-01
Supplement: c5nj02999f1.pdf [file c5nj02999f1.pdf]

## Supporting Information

### Cadmium metal–organic frameworks: Ln<sup>3+</sup> ions functionalized assembly, fluorescence tuning and polymer film preparation

Han Weng, Bing Yan\*

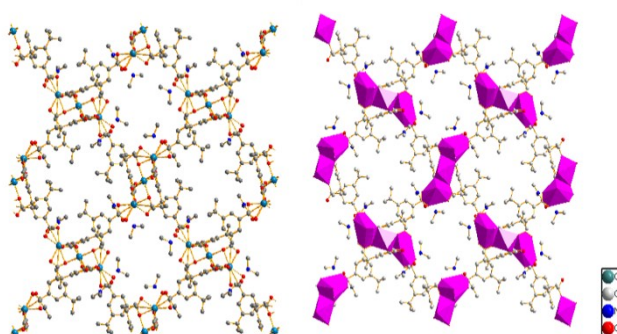

Scheme S1 The coordination environment of central atom Cd and the structure of Cd-MOF

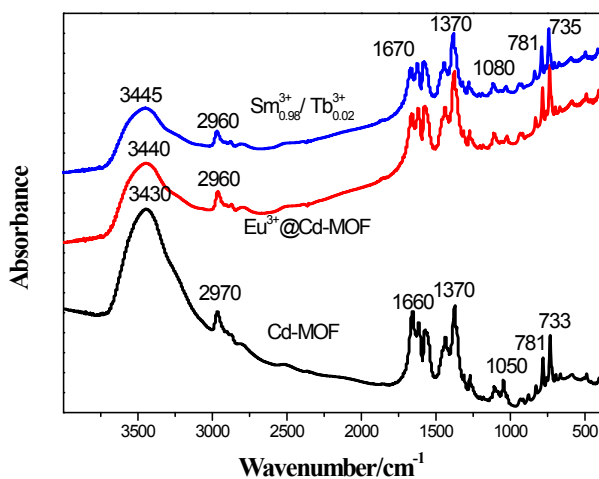

Fig. S1 FTIR spectra of as-synthesized Cd-MOF, Eu<sup>3+</sup>@Cd-MOF and Sm<sup>3+</sup><sub>0.98</sub>/Tb<sup>3+</sup><sub>0.02</sub>@Cd-MOF.

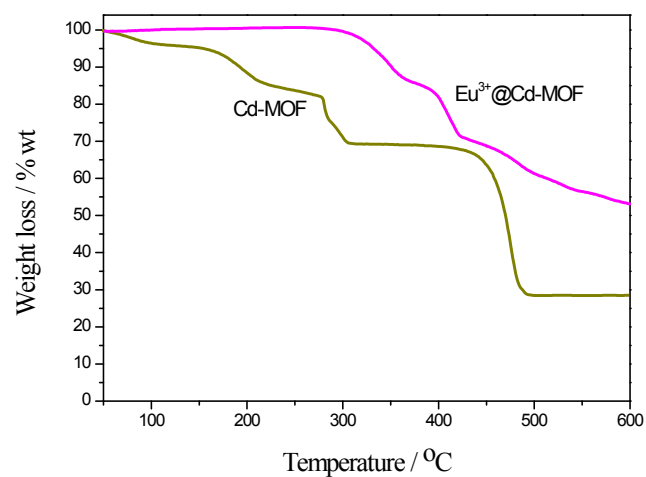

Fig. S2 Thermogravimetric analysis of Cd-MOF and Eu<sup>3+</sup>@Cd-MOF.

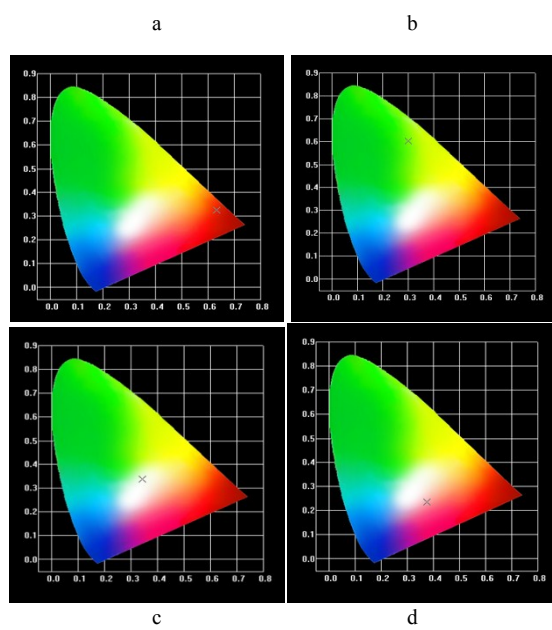

Fig. S3 CIE diagrams of Ln<sup>3+</sup>@Cd-MOF: (a) Ln=Eu; (b) Ln=Tb; (c) Ln=Sm; (d) Ln=Dy.

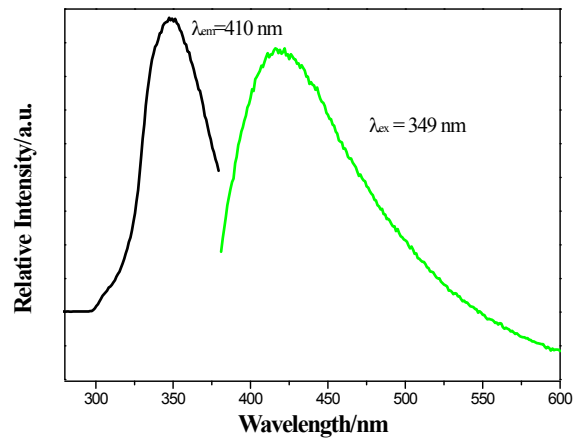

Fig. S4 Excitation and emission spectra of pure ligand 5-tbip.

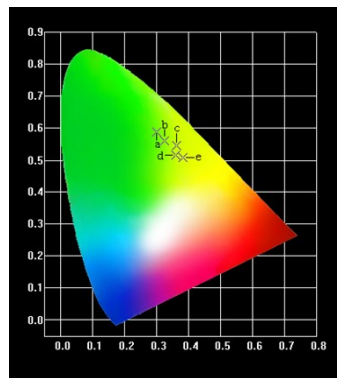

Fig. S5 CIE diagram of  $\text{Eu}^{3+}$  and  $\text{Tb}^{3+}$  co-activated MOF with a series of ratio: (a)  $\text{Eu}^{3+}:\text{Tb}^{3+}=1:9$ ; (b)  $\text{Eu}^{3+}:\text{Tb}^{3+}=2:8$ ; (c)  $\text{Eu}^{3+}:\text{Tb}^{3+}=3:7$ ; (d)  $\text{Eu}^{3+}:\text{Tb}^{3+}=4:5$ ; (e)  $\text{Eu}^{3+}:\text{Tb}^{3+}=5:5$ .

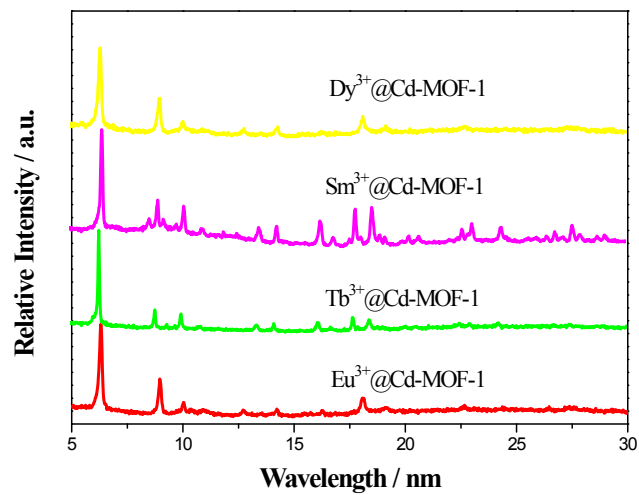

Fig. S6 PXRD patterns of  $\text{Ln}^{3+}@\text{Cd-MOF-2}$  ( $\text{Ln} = \text{Eu}, \text{Tb}, \text{Sm}, \text{Dy}$ ).

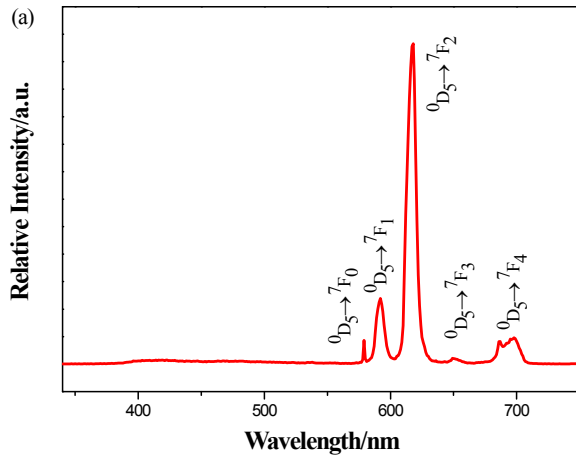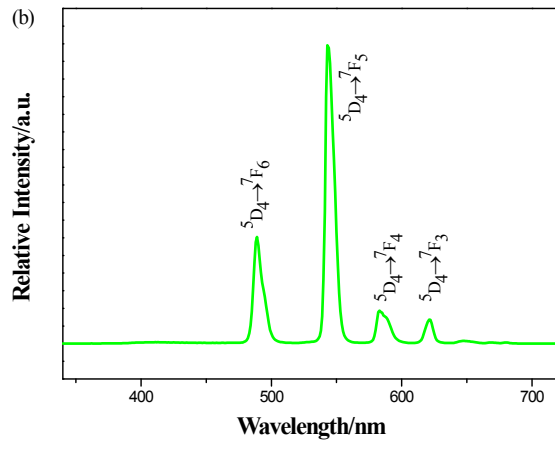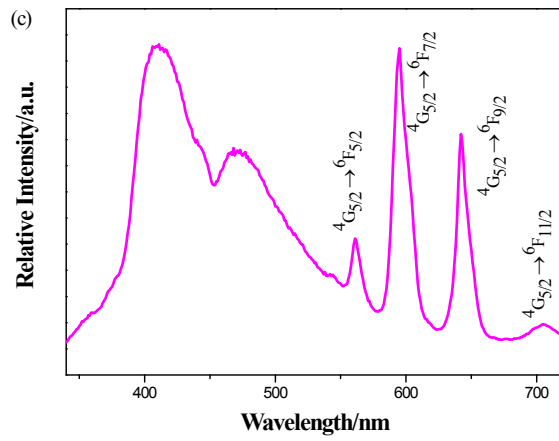

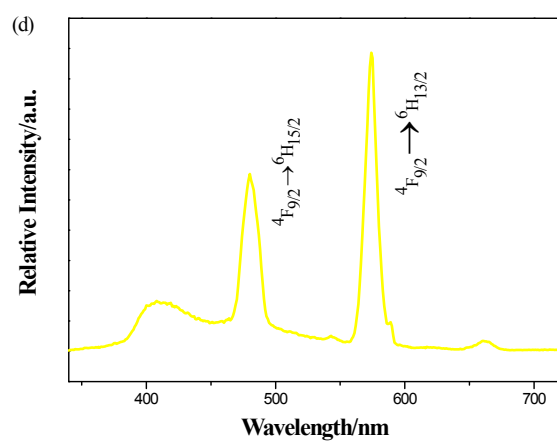

Fig. S7 Emission spectra of  $\text{Ln}^{3+}@\text{Cd-MOF-2}$  when excited at 293 nm. (a) Ln = Eu; (b) Ln = Tb; (c) Ln = Sm; (d) Ln=Dy.

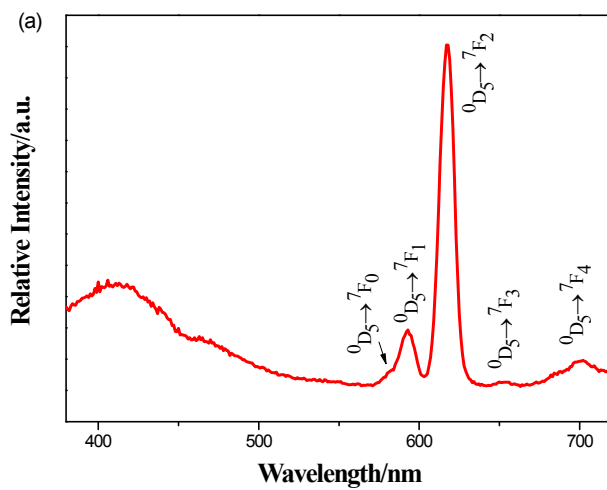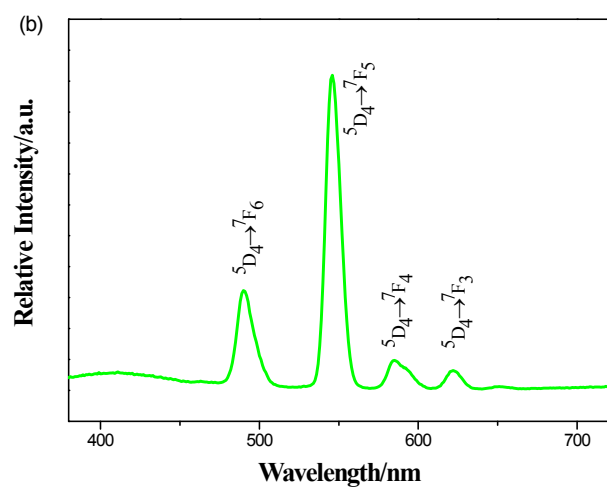

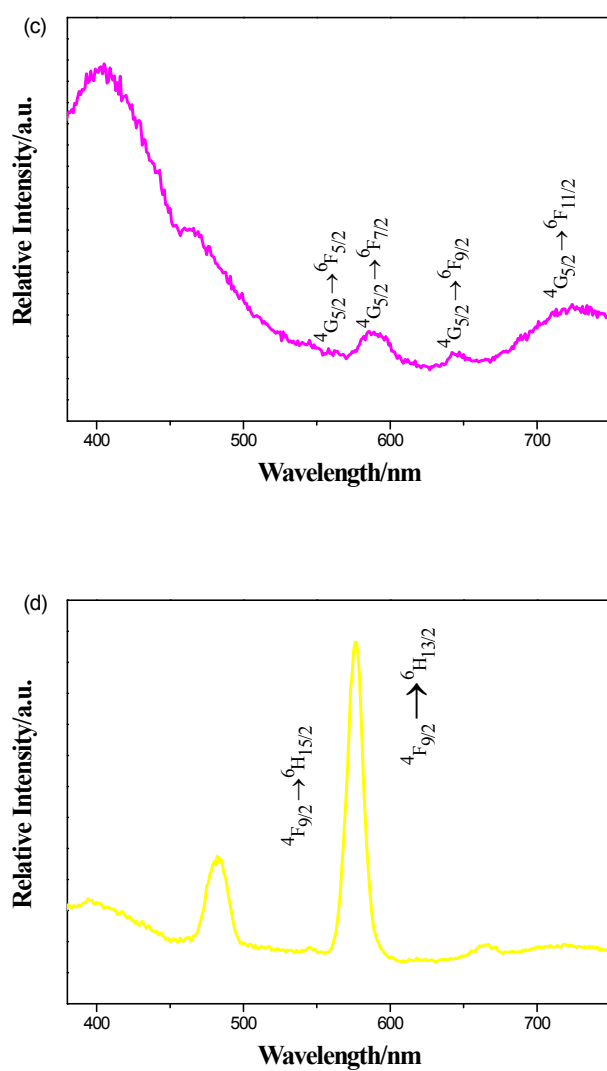

**Fig. S8** Emission spectra of Ln<sup>3+</sup>@Cd-MOF-2 polymer film when excited at 293 nm. (a) Ln = Eu; (b) Ln = Tb; (c) Ln = Sm; (d) Ln=Dy.

**Table S1** The detailed ICP-OES studies of Ln<sup>3+</sup>@Cd-MOF and Ln<sup>3+</sup>@Cd-MOF-2

| Samples                    | Cd <sup>2+</sup> (mg / L) | Ln <sup>3+</sup> (mg / L) | atomic ratio of Cd <sup>2+</sup> :Ln <sup>3+</sup> |
|----------------------------|---------------------------|---------------------------|----------------------------------------------------|
| Eu <sup>3+</sup> @Cd-MOF   | 253.652                   | 7.458                     | 1 : 0.029                                          |
| Tb <sup>3+</sup> @Cd-MOF   | 214.375                   | 7.197                     | 1 : 0.034                                          |
| Sm <sup>3+</sup> @Cd-MOF   | 220.854                   | 6.257                     | 1 : 0.028                                          |
| Dy <sup>3+</sup> @Cd-MOF   | 287.472                   | 7.240                     | 1 : 0.025                                          |
| Eu <sup>3+</sup> @Cd-MOF-2 | 276.430                   | 5.878                     | 1 : 0.021                                          |
| Tb <sup>3+</sup> @Cd-MOF-2 | 201.641                   | 4.920                     | 1 : 0.024                                          |
| Sm <sup>3+</sup> @Cd-MOF-2 | 187.785                   | 3.674                     | 1 : 0.020                                          |
| Dy <sup>3+</sup> @Cd-MOF-2 | 260.542                   | 4.751                     | 1 : 0.018                                          |
